# Supplementary material for: Parenting Style and Suicidal Behavior: A Focused Review
Source: Hindawi journal article supplement (doi:10.1155/2022/2138650), 2022-09-27
Supplement: f1 [file 2138650.f1.docx]

Search Details

**Search Terms**

((parenting and style) or (authoritative and parent*) or (authoritarian and parent*) or (permissive and parent*) or (disorgani* and parent*) or (neglect* and parent*)).ab OR ((parenting and style) or (authoritative and parent*) or (authoritarian and parent*) or (permissive and parent*) or (disorgani* and parent*) or (neglect* and parent*)).ti AND (self?harm* or suicid*).ab OR (self?harm* or suicid*).ti

The search was performed on October 30, 2021, at 2.30 PM (Dhaka Time; GMT +600 hrs).

**Data base search**

APA PsycInfo <1806 to October Week 4 2021>

1 ((parenting and style) or (authoritative and parent*) or (authoritarian and parent*) or (permissive and parent*) or (disorgani* and parent*) or (neglect* and parent*)).ab. or ((parenting and style) or (authoritative and parent*) or (authoritarian and parent*) or (permissive and parent*) or (disorgani* and parent*) or (neglect* and parent*)).ti. 12117

2 (self?harm* or suicid*).ab. or (self?harm* or suicid*).ti. 68768

3 1 and 2 235

Embase <1980 to 2021 Week 43>

1 ((parenting and style) or (authoritative and parent*) or (authoritarian and parent*) or (permissive and parent*) or (disorgani* and parent*) or (neglect* and parent*)).ab. or ((parenting and style) or (authoritative and parent*) or (authoritarian and parent*) or (permissive and parent*) or (disorgani* and parent*) or (neglect* and parent*)).ti. 8527

2 (self?harm* or suicid*).ab. or (self?harm* or suicid*).ti. 103718

3 1 and 2 239

https://www.webofscience.com/wos/woscc/summary/9ab5f4cc-84b1-4b59-b576-2dfb33f44e30-0ffc840f/relevance/1

Ovid MEDLINE(R) <1946 to present>

1 ((parenting and style) or (authoritative and parent*) or (authoritarian and parent*) or (permissive and parent*) or (disorgani* and parent*) or (neglect* and parent*)).ab. or ((parenting and style) or (authoritative and parent*) or (authoritarian and parent*) or (permissive and parent*) or (disorgani* and parent*) or (neglect* and parent*)).ti. 6802

2 (self?harm* or suicid*).ab. or (self?harm* or suicid*).ti. 82584

3 1 and 2 174
